# Supplementary material for: Screening of biocontrol bacteria against soft rot disease of Colocasia esculenta (L.) schott and its field application
Source: PubMed Central journal article supplement (PMC8274833; doi:10.1371/journal.pone.0254070), 2021-07-12

Marker Blank CAB-L005 CAB-L009 CAB-L012 CAB-L013 CAB-L014 CAB-L022 CAB-L023 CAB-L026 CAB-L037 X

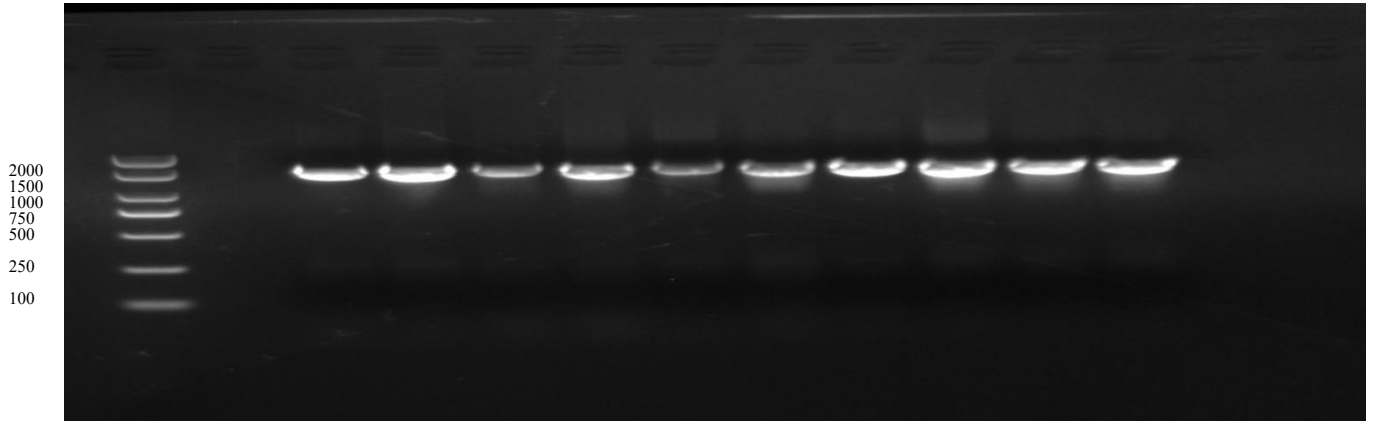

Supplement: pone.0254070.s001.pdf [file pone.0254070.s001.pdf]
